# Supplementary figures and images for: Effectiveness of a clinical pathway for acute stroke care in a district general hospital: an audit
Source: Springer Nature journal article supplement (doi:10.1186/1472-6963-6-16), 2006-02-24

Prior to Stroke Pathway Jul02 thru Dec02

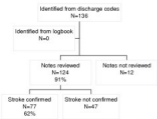

Subsequent to Stroke Pathway Jul03 thru Dec03

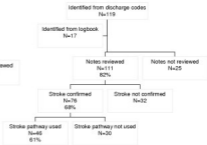

Supplement: 12913_2005_193_MOESM1_ESM.pdf [file 12913_2005_193_MOESM1_ESM.pdf]

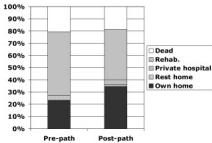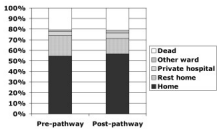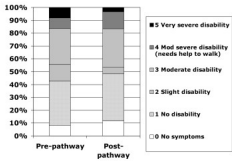

Supplement: 12913_2005_193_MOESM2_ESM.pdf [file 12913_2005_193_MOESM2_ESM.pdf]
